# Supplementary material for: Age-Related and Heteroplasmy-Related Variation in Human mtDNA Copy Number
Source: PLoS Genet. 2016 Mar 15;12(3):e1005939. doi: 10.1371/journal.pgen.1005939 (PMC4792396; doi:10.1371/journal.pgen.1005939)
Supplement: S6 Table — Tested sites were found in at least ten individuals in the indicated tissue. F-value, correlation coefficient r and p-values (corrected for multiple testing) are given. Sites with significant correlations with mtCN are marked in red. (XLS) [file pgen.1005939.s013.xls]

## Sheet: S6 Table
site	tissue	method mtCN determination	F-value	p-value	r-value
72	BL	ddPCR	1.72	1	-0.11
189	BL	ddPCR	0.01	1	-0.01
204	BL	ddPCR	0.46	1	-0.06
72	BL	shotgun	3.92	0.297	-0.16
189	BL	shotgun	0.22	1	0.04
204	BL	shotgun	0.23	1	-0.04
72	BL	capture-enrichment	7.04	0.053	-0.22
189	BL	capture-enrichment	0.01	1	0.01
204	BL	capture-enrichment	0.65	1	-0.07
64	SM	ddPCR	0.31	1	-0.05
72	SM	ddPCR	0.22	1	-0.04
185	SM	ddPCR	0.25	1	0.04
189	SM	ddPCR	1.75	1	-0.11
408	SM	ddPCR	11.34	0.053	-0.27
564	SM	ddPCR	1.29	1	-0.09
16148	SM	ddPCR	0.04	1	-0.02
16327	SM	ddPCR	8.67	0.103	-0.23
16355	SM	ddPCR	0.58	1	-0.06
16537	SM	ddPCR	0.05	1	-0.02
64	SM	shotgun	0.92	1	-0.08
72	SM	shotgun	0.13	1	-0.03
185	SM	shotgun	0.13	1	0.03
189	SM	shotgun	2.62	1	-0.13
408	SM	shotgun	12.58	0.014	-0.28
564	SM	shotgun	1.62	1	-0.1
16148	SM	shotgun	0.07	1	-0.02
16327	SM	shotgun	12.8	0.014	-0.28
16355	SM	shotgun	1.23	1	-0.09
16537	SM	shotgun	0.15	1	-0.03
64	SM	capture-enrichment	1.03	1	-0.08
72	SM	capture-enrichment	0.71	1	-0.07
185	SM	capture-enrichment	0.01	1	0.01
189	SM	capture-enrichment	1.97	1	-0.11
408	SM	capture-enrichment	8.05	0.143	-0.23
564	SM	capture-enrichment	1.46	1	-0.1
16148	SM	capture-enrichment	0	1	0
16327	SM	capture-enrichment	8.18	0.143	-0.23
16355	SM	capture-enrichment	1.04	1	-0.08
16537	SM	capture-enrichment	0.33	1	-0.05
60	LIV	shotgun	0.4	1	0.05
72	LIV	shotgun	2.44	1	0.13
94	LIV	shotgun	0.13	1	0.03
189	LIV	shotgun	0.3	1	0.05
203	LIV	shotgun	0.02	1	-0.01
16126	LIV	shotgun	0.78	1	-0.08
16148	LIV	shotgun	0	1	0
60	LIV	capture-enrichment	0.3	1	0.04
72	LIV	capture-enrichment	2.13	1	0.12
94	LIV	capture-enrichment	0.01	1	0.01
189	LIV	capture-enrichment	0	1	0.01
203	LIV	capture-enrichment	0.09	1	0.02
16126	LIV	capture-enrichment	0	1	0
16148	LIV	capture-enrichment	0.05	1	0.02
72	MM	shotgun	2.23	1	0.12
185	MM	shotgun	0.24	1	-0.04
189	MM	shotgun	0.53	1	0.06
204	MM	shotgun	0.78	1	0.07
564	MM	shotgun	0.02	1	-0.01
72	MM	capture-enrichment	1.36	1	0.1
185	MM	capture-enrichment	0.05	1	-0.02
189	MM	capture-enrichment	0.67	1	0.07
204	MM	capture-enrichment	0.29	1	0.04
564	MM	capture-enrichment	0.01	1	-0.01
72	CEL	capture-enrichment	5.88	0.248	0.2
185	CEL	capture-enrichment	1.2	1	-0.09
189	CEL	capture-enrichment	0.05	1	0.02
16126	CEL	capture-enrichment	1.39	1	-0.1
16148	CEL	capture-enrichment	3.67	0.431	0.16
72	CER	capture-enrichment	0	1	0
189	CER	capture-enrichment	5.9	0.344	0.2
408	CER	capture-enrichment	3.27	0.656	0.15
16126	CER	capture-enrichment	2.38	0.656	0.13
16148	CER	capture-enrichment	1.55	0.902	0.1
16519	CER	capture-enrichment	2.84	0.656	-0.14
72	CO	capture-enrichment	0.05	1	0.02
189	CO	capture-enrichment	0.04	1	0.02
408	CO	capture-enrichment	0.31	1	0.05
16126	CO	capture-enrichment	0.24	1	-0.04
16148	CO	capture-enrichment	0.26	1	-0.04
60	KI	capture-enrichment	0.36	1	0.05
64	KI	capture-enrichment	0.24	1	-0.04
72	KI	capture-enrichment	3.51	1	0.15
94	KI	capture-enrichment	0.72	1	0.07
189	KI	capture-enrichment	0.75	1	-0.07
203	KI	capture-enrichment	1.13	1	-0.09
189	LI	capture-enrichment	0	1	-0.01
204	LI	capture-enrichment	0.04	1	-0.02
564	LI	capture-enrichment	0.12	1	-0.03
16126	LI	capture-enrichment	0.04	1	-0.02
16390	LI	capture-enrichment	0.26	1	-0.04
189	OV	capture-enrichment	0.58	0.451	-0.11
72	SI	capture-enrichment	0.82	1	-0.07
189	SI	capture-enrichment	0.01	1	-0.01
204	SI	capture-enrichment	2.72	1	-0.13
564	SI	capture-enrichment	1.02	1	0.08
16390	SI	capture-enrichment	1.84	1	0.11
72	SK	capture-enrichment	0.28	1	0.04
189	SK	capture-enrichment	1.49	1	0.1
204	SK	capture-enrichment	0.2	1	-0.04
414	SK	capture-enrichment	0.01	1	-0.01
